# Supplementary material for: Serological, fragmentomic, and epigenetic characteristics of cell-free DNA in patients with lupus nephritis
Source: Frontiers journal article supplement (doi:10.3389/fimmu.2022.1001690), 2022-12-12
Supplement: Data_Sheet_1.ZIP [file Data_Sheet_1.ZIP]

(A)

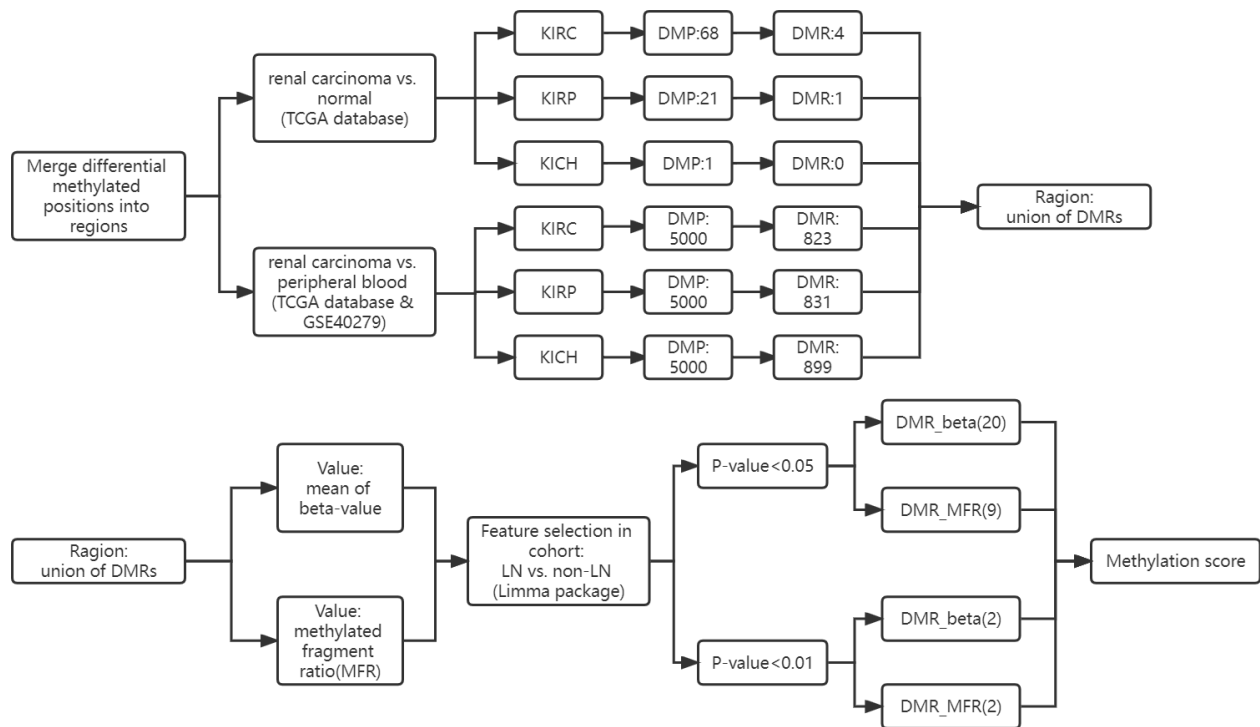

(B)

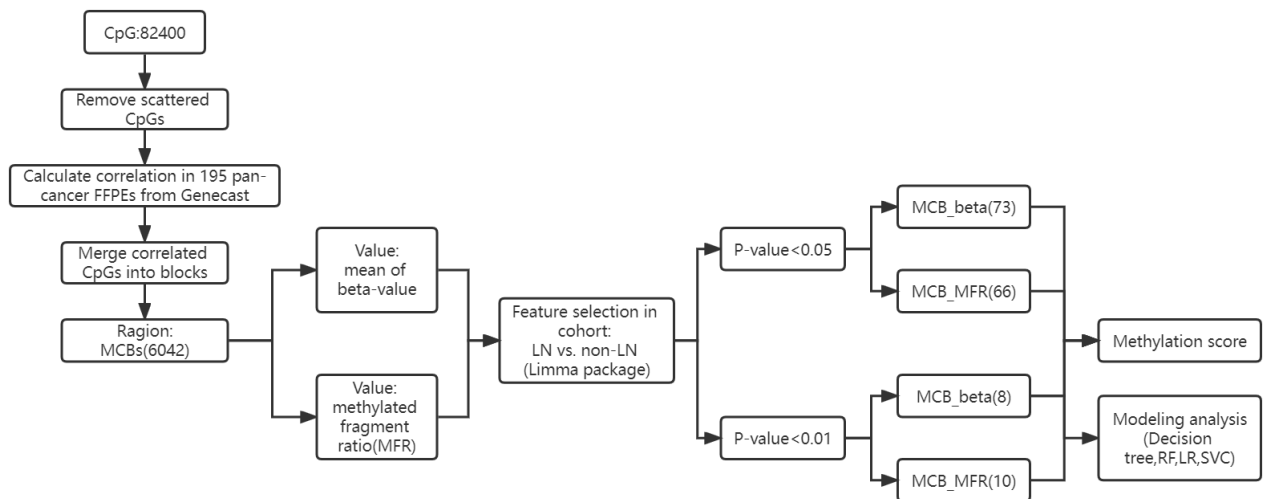

**Supplement Figure 1.** Methylation analysis flow charts based on the renal carcinoma data in TCGA database (A) and the pan-cancer panel (B).
